# Supplementary material for: Brucella abortus Rough-Type Mutant Induces Ferroptosis and More Oxidative Stress in Infected Macrophages
Source: MDPI journal article supplement (doi:10.3390/pathogens12101189), 2023-09-23
Supplement: s1 [file s1]

**Table S1. Significantly regulated apoptosis-related genes postinfection (RB14 versus S2308)**

| Gene                              | log2(foldchange) | P value     | description                                                 |
|-----------------------------------|------------------|-------------|-------------------------------------------------------------|
| <b>Apoptosis regulators (4h)</b>  |                  |             |                                                             |
| Madd                              | -7.44332         | 0.0102399   | MAP kinase-activating death domain protein                  |
| Hax1                              | -3.75837         | 0.0148648   | HS1-associating protein X-1                                 |
| Hnrnpk                            | inf              | 0.0322088   | heterogeneous nuclear ribonucleoprotein-K                   |
| Zmynd11                           | -3.89904         | 0.0259966   | Zinc finger MYND domain-containing protein 11               |
| Eif5a                             | 3.32074          | 0.0026443   | Translation elongation factor, IF5A                         |
| Edn1                              | 3.29317          | 0.0140227   | Endothelin-1                                                |
| Plk2                              | 1.67528          | 0.037466    | Polo-like kinase 2                                          |
| <b>Apoptosis regulators (8h)</b>  |                  |             |                                                             |
| Tnf                               | 2.4              | 0.00925408  | Tumour necrosis factor                                      |
| Phlda1                            | 2.96505          | 0.000950341 | Pleckstrin homology-like domain family A member 1           |
| Ifit2                             | 1.84511          | 0.0219366   | Interferon-induced protein with tetratricopeptide repeats 2 |
| Ptgs2                             | 3.60541          | 0.000294431 | Forkhead box protein L2                                     |
| Cd40                              | 3.88115          | 0.0287682   | Tumour necrosis factor receptor 5                           |
| Ccl3                              | 2.1174           | 0.0447028   | C-C motif chemokine 3                                       |
| Edn1                              | 3.29317          | 0.0140227   | Endothelin-1                                                |
| Skil                              | 5.27626          | 0.0315321   | Ski-like protein                                            |
| Cd24a                             | -2.36321         | 0.0279978   | Signal transducer CD24                                      |
| <b>Apoptosis regulators (24h)</b> |                  |             |                                                             |
| Rffl                              | -2.83177         | 0.031       | Zinc finger, RING-type                                      |
| Tnfrsf23                          | -3.32059         | 0.0003      | TNFR/NGFR cysteine-rich region                              |
| Bcl2l1                            | -1.91148         | 0.031       | Apoptosis regulator, Bcl-2 protein                          |
| Bcl2a1a                           | -2.44177         | 0.047       | Bcl-2-related protein A1                                    |
| Mcl1                              | -3.94589         | 0.001       | Apoptosis regulator, Mcl-1                                  |

|                                   |          |             |                                                                  |
|-----------------------------------|----------|-------------|------------------------------------------------------------------|
| Serpine1                          | -6.58351 | 4.60E-10    | Serpin domain                                                    |
| Serpinb2                          | -8.05638 | 1.39E-11    | Serpin B2                                                        |
| Melk                              | 3.83023  | 0.0012424   | Maternal embryonic<br>leucine zipper kinase                      |
| Serpinb9                          | -4.48496 | 5.57E-05    | Serpin B9/maspin                                                 |
| Serpinb9b                         | Inf      | 0.016       | Serpin B9/maspin                                                 |
| Cebpb                             | -2.93619 | 0.0004      | CCAAT/enhancer-binding<br>protein beta                           |
| Brca2                             | 4.2329   | 0.000949164 | Breast cancer type 2<br>susceptibility protein                   |
| E2f2                              | 3.2491   | 0.00743477  | E2F/DP family                                                    |
| E2f1                              | 2.35434  | 0.0415558   | E2F/DP family                                                    |
| Plekhf1                           | 3.45776  | 0.0246415   | Pleckstrin homology<br>domain                                    |
| Trp53                             | 5.08989  | 0.0124723   | p53 tumour suppressor                                            |
| Mmp9                              | -2.35686 | 0.032       | metallopeptidase                                                 |
| Hgf                               | -4.73832 | 0.010       | Hepatocyte growth                                                |
| Grina                             | -2.19038 | 0.007       | Bax inhibitor 1-related                                          |
| Src                               | 3.43942  | 0.026       | Tyrosine-protein kinase                                          |
| Tmbim6                            | -3.76295 | 0.0006      | Bax inhibitor 1, conserved<br>site                               |
| Mef2c                             | 3.66429  | 0.015       | MADS-box                                                         |
| Plekhf1                           | 3.45776  | 0.0246415   | Pleckstrin homology<br>domain                                    |
| Tnfaip3                           | -2.69206 | 0.0186418   | Tumor necrosis factor<br>alpha-induced protein 3                 |
| <b>Apoptosis regulators (48h)</b> |          |             |                                                                  |
| Ambra1                            | inf      | 0.0493014   | Activating molecule in<br>BECN1-regulated<br>autophagy protein 1 |
| Jade1                             | 8.04701  | 0.0272346   | Protein Jade-1                                                   |
| Inhba                             | 3.90835  | 0.00946889  | Inhibin beta A chain                                             |
| Herc2                             | 2.83     | 0.032       | HECT domain and<br>RCC1-like domain 2                            |
| Nr4a1                             | 2.5619   | 0.0196435   | Nuclear hormone<br>receptor                                      |
| Tnfrsf1b                          | 1.63388  | 0.0412559   | Tumour necrosis factor<br>receptor 1B                            |
| Ncor1                             | 5.005    | 0.0087      | nuclear receptor co-<br>repressor                                |
| Arid1a                            | 3.24     | 0.035       | AT-rich interactive<br>domain-containing<br>protein 1A           |

---

**Table S2. Specific primers of candidate genes for RT-qPCR used in this study**

| <b>Primers</b>   | <b>Sequences</b>        |
|------------------|-------------------------|
| Prdx5-F          | GGCTGTTCTAAGACCCACCTG   |
| Prdx5-R          | GGAGCCGAACCTTGCCTTC     |
| TNF- $\alpha$ -F | AGACCCTCACACTCAGATCA    |
| TNF- $\alpha$ -R | TTGCTACGACGTGGGCTACA    |
| Plaur-F          | CAGAGCTTTCCACCGAATGG    |
| Plaur-R          | GTCCCCGGCAGTTGATGAG     |
| Pdp1-F           | GGCCCAGACGAATTGGAATC    |
| Pdp1-R           | AGTTGAGTTGGTGCTGGCAT    |
| Plk2-F           | CCTGCGGACTATCACCTACCA   |
| Plk2-R           | CTGCCCATCTTCAGAAGGCT    |
| Plk3-F           | CTGTAGCCGAAAGTCCCTGG    |
| Plk3-R           | AGGATCTGGCGCAGGTAGTA    |
| Edn1-F           | GGCCCAAAGTACCATGCAGA    |
| Edn1-R           | GATGGCCTCCAACCTTCGTA    |
| Hgf-F            | CCATCCCCTATGCAGAAGGAC   |
| Hgf-R            | CTGATACACCTGTTGGCACAC   |
| Phlda1-F         | GGGCTACTGCTCATACCGC     |
| Phlda1-R         | AAAAGTGCAATTCCTTCAGCTTG |
| $\beta$ -actin-F | GGCTGTATTCCCCTCCATCG    |
| $\beta$ -actin-R | CCAGTTGGTAACAATGCCATGT  |
